# Supplementary material
Source: PubMed Central journal article supplement (PMC4369215)
Supplement: hesr0050-0398-sd2.pdf [file hesr0050-0398-sd2.pdf]

**AHRQ SES Index Score** =  $50 + (-0.07 * \text{crowded}) + (0.08 * \text{prop100}) + (-0.10 * \text{pct\_poverty}) + (0.11 * \text{hhinc100}) + (0.10 * \text{high\_educ}) + (-0.11 * \text{low\_educ}) + (-0.08 * \text{pct\_unemp})$

**Abbreviations:**

crowded = Percentage of households containing one or more person per room

prop100 = Median value of owner-occupied values, standardized to range from 0-100

pct\_poverty = Percentage of persons below the federally defined poverty line

hhinc100 = Median household income, standardized to range from 0-100

high\_educ = Percentage of persons aged  $\geq 25$  years with at least 4 years of college

low\_educ = Percentage of persons aged  $\geq 25$  years with less than a 12th-grade education

pct\_unemp = Percentage of persons aged 16 years or older in the labor force who are unemployed (and actively seeking work)

**NDI Score** =  $(.397 * \text{pct\_hh\_poverty}) + (.357 * \text{fem\_hh\_w\_dep}) + (.386 * \text{hh\_less\_30k}) + (0.382 \text{ hh\_w\_publa}) + (-0.285 \text{ male\_mngmt}) + (.261 \text{ crowded}) + (.366 \text{ pct\_unemp}) + (.369 * \text{low\_educ})$

**Abbreviations:**

pct\_hh\_poverty = % of household in poverty

fem\_hh\_w\_dep = % female headed households with dependents

hh\_less\_30k = % households earning <\$30,000 per year

hh\_w\_publa = % households on public assistance

male\_mngmt = % of males in management and professional occupations

crowded = Percentage of households containing one or more person per room

pct\_unemp = Percentage of persons aged 16 years or older in the labor force who are unemployed (and actively seeking work)

low\_educ = Percentage of persons aged  $\geq 25$  years with less than a 12th-grade education
